# Supplementary material for: A new Mentor Evaluation Tool: Evidence of validity
Source: PubMed Central journal article supplement (PMC7297334; doi:10.1371/journal.pone.0234345), 2020-06-16
Supplement: pone.0234345.s001.pdf [file pone.0234345.s001.pdf]

S1 Appendix 1 Mentor Evaluation Tool:

Q1 This survey allows mentees to evaluate their mentors with a confidential, standardized, quantitative instrument. It takes about 5 minutes to complete.

Q2 First name of your mentor.

Q3 Last name of your mentor. Q4 Your mentor's school.

- School of Dentistry
- School of Medicine
- School of Nursing
- School of Pharmacy

Q5 Your academic position.

- Faculty member
- Resident, fellow or postdoc
- Student

If resident, fellow, postdoc or student was selected Qualtrics branching automatically skipped to question 9.

Q6 If you are a faculty member, please select your rank:

- Instructor
- Assistant Professor
- Associate Professor
- Professor

Q7 Your faculty series:

- Adjunct
- Clinical X
- Health Sciences Clinical
- In Residence
- Ladder Rank
- Not Sure

Q8 Your faculty step (Three step levels for Assistant Professor, Three step levels for Associate Professor and up to 9 step levels for Professor):

- 1
- 2
- 3
- 4
- 5
- 6
- 7
- 8
- 9
- Above scale
- Not Sure

Q9 How many years has this person been your mentor?

- Less than one year
- 1 – 2 years
- 2 – 3 years
- 3 years or more

Q10 Was this mentor assigned to you or someone you found on your own?

- Assigned
- I found myself
- Other (please explain): \_\_\_\_\_

Q11 What role does this mentor provide for you? (select all that apply)

- Research/Scholarly Mentor Provides overall research and/or scholarly guidance.
- Project Mentor Supervises a defined, time-limited project, e.g. data collection, data analysis, manuscript preparation, grant preparation, curriculum or course development.
- Career Mentor Provides overall career guidance and support mentoring.
- Co-Mentor or Clinical Mentor Provides specialized, content area, methodological or clinical expertise as part of a mentoring research or clinical team.

Q12 Please indicate how strongly you agree or disagree with the statements below.



|                                                                 |                       |                       |                       |                       |                       |                       |                       |                       |
|-----------------------------------------------------------------|-----------------------|-----------------------|-----------------------|-----------------------|-----------------------|-----------------------|-----------------------|-----------------------|
| My mentor takes a sincere interest in my career. (9)            | <input type="radio"/> | <input type="radio"/> | <input type="radio"/> | <input type="radio"/> | <input type="radio"/> | <input type="radio"/> | <input type="radio"/> | <input type="radio"/> |
| My mentor helps me to formulate clear goals. (10)               | <input type="radio"/> | <input type="radio"/> | <input type="radio"/> | <input type="radio"/> | <input type="radio"/> | <input type="radio"/> | <input type="radio"/> | <input type="radio"/> |
| My mentor facilitates building my professional network. (11)    | <input type="radio"/> | <input type="radio"/> | <input type="radio"/> | <input type="radio"/> | <input type="radio"/> | <input type="radio"/> | <input type="radio"/> | <input type="radio"/> |
| My mentor provides thoughtful advice on my scholarly work. (12) | <input type="radio"/> | <input type="radio"/> | <input type="radio"/> | <input type="radio"/> | <input type="radio"/> | <input type="radio"/> | <input type="radio"/> | <input type="radio"/> |
| My mentor is supportive of work-life balance. (13)              | <input type="radio"/> | <input type="radio"/> | <input type="radio"/> | <input type="radio"/> | <input type="radio"/> | <input type="radio"/> | <input type="radio"/> | <input type="radio"/> |
| Overall, I'm satisfied with my mentor. (14)                     | <input type="radio"/> | <input type="radio"/> | <input type="radio"/> | <input type="radio"/> | <input type="radio"/> | <input type="radio"/> | <input type="radio"/> | <input type="radio"/> |

Q13 To SAVE and SUBMIT your responses, please click the right arrow. If you want to exit without saving your responses, close this window without clicking the arrow.
