# Supplementary material for: A new Mentor Evaluation Tool: Evidence of validity
Source: PubMed Central journal article supplement (PMC7297334; doi:10.1371/journal.pone.0234345), 2020-06-16
Supplement: pone.0234345.s002.pdf [file pone.0234345.s002.pdf]

| <b>MentorID</b> | <b>Mentor Group</b> | <b>Years Mentoring</b> | <b>Your academic position.</b> | <b>How many years has this person been your mentor?</b> |
|-----------------|---------------------|------------------------|--------------------------------|---------------------------------------------------------|
| 2               | LAMA                | 45                     | Student                        | 3 years or more                                         |
| 2               | LAMA                | 45                     | Faculty member                 | 3 years or more                                         |
| 2               | LAMA                | 45                     | Student                        | 3 years or more                                         |
| 2               | LAMA                | 45                     | Student                        | 3 years or more                                         |
| 10              | LAMA                | 30                     | Faculty member                 | 3 years or more                                         |
| 10              | LAMA                | 30                     | Faculty member                 | 3 years or more                                         |
| 11              | LAMA                | 18                     | Faculty member                 | 3 years or more                                         |
| 11              | LAMA                | 18                     | Faculty member                 | 3 years or more                                         |
| 14              | LAMA                | 37                     | Faculty member                 | 3 years or more                                         |
| 14              | LAMA                | 37                     | Faculty member                 | 3 years or more                                         |
| 17              | LAMA                | 30                     | Resident, fellow or postdoc    | 2 to 3 years                                            |
| 17              | LAMA                | 30                     | Resident, fellow or postdoc    | 3 years or more                                         |
| 17              | LAMA                | 30                     | Faculty member                 | 3 years or more                                         |
| 17              | LAMA                | 30                     | Faculty member                 | 3 years or more                                         |
| 23              | LAMA                |                        | Faculty member                 | 3 years or more                                         |
| 30              | LAMA                | 15                     | Faculty member                 | 3 years or more                                         |
| 30              | LAMA                | 15                     | Faculty member                 | 3 years or more                                         |
| 30              | LAMA                | 15                     | Faculty member                 | 3 years or more                                         |
| 33              | LAMA                | 40                     | Faculty member                 | 3 years or more                                         |
| 33              | LAMA                | 40                     | Faculty member                 | 3 years or more                                         |
| 33              | LAMA                | 40                     | Faculty member                 | 3 years or more                                         |
| 35              | LAMA                | 25                     | Faculty member                 | 3 years or more                                         |
| 35              | LAMA                | 25                     | Faculty member                 | 1 to 2 years                                            |
| 36              | LAMA                | 31                     | Faculty member                 | 3 years or more                                         |
| 36              | LAMA                | 31                     | Resident, fellow or postdoc    | 3 years or more                                         |
| 36              | LAMA                | 31                     | Faculty member                 | 3 years or more                                         |
| 38              | LAMA                | 53                     | Faculty member                 | 3 years or more                                         |
| 38              | LAMA                | 53                     | Faculty member                 | 3 years or more                                         |
| 38              | LAMA                | 53                     | Faculty member                 | 3 years or more                                         |
| 41              | LAMA                | 27                     | Faculty member                 | 3 years or more                                         |
| 41              | LAMA                | 27                     | Resident, fellow or postdoc    | 2 to 3 years                                            |
| 41              | LAMA                | 27                     | Resident, fellow or postdoc    | 2 to 3 years                                            |

|    |      |    |                             |                    |
|----|------|----|-----------------------------|--------------------|
| 41 | LAMA | 27 | Faculty member              | 3 years or more    |
| 46 | LAMA | 30 | Faculty member              | 3 years or more    |
| 46 | LAMA | 30 | Resident, fellow or postdoc | 3 years or more    |
| 46 | LAMA | 30 | Student                     | 1 to 2 years       |
| 46 | LAMA | 30 | Faculty member              | 3 years or more    |
| 49 | LAMA | 37 | Resident, fellow or postdoc | 3 years or more    |
| 49 | LAMA | 37 | Faculty member              | 3 years or more    |
| 49 | LAMA | 37 | Student                     | 3 years or more    |
| 56 | LAMA | 29 | Student                     | 3 years or more    |
| 56 | LAMA | 29 | Faculty member              | 3 years or more    |
| 59 | LAMA | 40 | Faculty member              | 3 years or more    |
| 1  | MDP  | 9  | Student                     | 2 to 3 years       |
| 1  | MDP  | 9  | Faculty member              | 3 years or more    |
| 1  | MDP  | 9  | Faculty member              | 3 years or more    |
| 1  | MDP  | 9  | Faculty member              | 3 years or more    |
| 3  | MDP  | 10 | Faculty member              | 2 to 3 years       |
| 3  | MDP  | 10 | Resident, fellow or postdoc | 3 years or more    |
| 3  | MDP  | 10 | Faculty member              | 3 years or more    |
| 4  | MDP  |    | Faculty member              | 3 years or more    |
| 7  | MDP  |    | Faculty member              | 3 years or more    |
| 8  | MDP  | 8  | Faculty member              | 2 to 3 years       |
| 9  | MDP  | 15 | Faculty member              | 1 to 2 years       |
| 9  | MDP  | 15 | Faculty member              | 2 to 3 years       |
| 9  | MDP  | 15 | Student                     | 1 to 2 years       |
| 12 | MDP  | 7  | Faculty member              | 2 to 3 years       |
| 12 | MDP  | 7  | Faculty member              | 3 years or more    |
| 15 | MDP  | 12 | Student                     | Less than one year |
| 15 | MDP  | 12 | Faculty member              | 3 years or more    |
| 15 | MDP  | 12 | Faculty member              | 3 years or more    |
| 16 | MDP  | 4  | Resident, fellow or postdoc | 1 to 2 years       |
| 18 | MDP  | 10 | Faculty member              | 3 years or more    |
| 18 | MDP  | 10 | Faculty member              | 3 years or more    |
| 19 | MDP  | 20 | Resident, fellow or postdoc | 3 years or more    |
| 22 | MDP  | 8  | Faculty member              | 3 years or more    |
| 22 | MDP  | 8  | Resident, fellow or postdoc | 3 years or more    |
| 22 | MDP  | 8  | Faculty member              | 3 years or more    |
| 24 | MDP  | 6  | Resident, fellow or postdoc | 2 to 3 years       |

|    |     |   |    |                             |                    |
|----|-----|---|----|-----------------------------|--------------------|
| 24 | MDP |   | 6  | Resident, fellow or postdoc | 1 to 2 years       |
| 24 | MDP |   | 6  | Resident, fellow or postdoc | 2 to 3 years       |
| 24 | MDP |   | 6  | Resident, fellow or postdoc | 3 years or more    |
| 24 | MDP |   | 6  | Faculty member              | 1 to 2 years       |
| 25 | MDP |   | 5  | Faculty member              | 3 years or more    |
| 26 | MDP |   | 10 | Resident, fellow or postdoc | 2 to 3 years       |
| 27 | MDP | . |    | Faculty member              | 3 years or more    |
| 28 | MDP |   | 12 | Resident, fellow or postdoc | 2 to 3 years       |
| 31 | MDP | . |    | Faculty member              | 2 to 3 years       |
| 31 | MDP | . |    | Faculty member              | 2 to 3 years       |
| 31 | MDP | . |    | Faculty member              | 3 years or more    |
| 31 | MDP | . |    | Faculty member              | Less than one year |
| 34 | MDP |   | 8  | Faculty member              | 3 years or more    |
| 37 | MDP |   | 15 | Resident, fellow or postdoc | 3 years or more    |
| 37 | MDP |   | 15 | Resident, fellow or postdoc | 3 years or more    |
| 37 | MDP |   | 15 | Faculty member              | 3 years or more    |
| 39 | MDP |   | 15 | Faculty member              | 3 years or more    |
| 39 | MDP |   | 15 | Faculty member              | 3 years or more    |
| 45 | MDP | . |    | Resident, fellow or postdoc | Less than one year |
| 45 | MDP | . |    | Resident, fellow or postdoc | 1 to 2 years       |
| 50 | MDP |   | 7  | Resident, fellow or postdoc | 1 to 2 years       |
| 50 | MDP |   | 7  | Faculty member              | 2 to 3 years       |
| 51 | MDP |   | 15 | Faculty member              | 3 years or more    |
| 51 | MDP |   | 15 | Resident, fellow or postdoc | 2 to 3 years       |
| 52 | MDP |   | 10 | Student                     | 1 to 2 years       |
| 52 | MDP |   | 10 | Student                     | Less than one year |
| 52 | MDP |   | 10 | Faculty member              | Less than one year |
| 52 | MDP |   | 10 | Student                     | 2 to 3 years       |
| 54 | MDP |   | 12 | Faculty member              | 3 years or more    |
| 55 | MDP |   | 12 | Resident, fellow or postdoc | 2 to 3 years       |
| 55 | MDP |   | 12 | Resident, fellow or postdoc | 1 to 2 years       |

|    |              |    |                             |                    |
|----|--------------|----|-----------------------------|--------------------|
| 55 | MDP          | 12 | Faculty member              | 3 years or more    |
| 56 | MDP          | 29 | Faculty member              | 3 years or more    |
| 60 | MDP          | 12 | Faculty member              | 2 to 3 years       |
| 60 | MDP          | 12 | Faculty member              | 3 years or more    |
| 61 | MDP          | 7  | Faculty member              | 3 years or more    |
| 61 | MDP          | 7  | Resident, fellow or postdoc | 3 years or more    |
| 61 | MDP          | 7  | Faculty member              | 3 years or more    |
| 5  | Non-LAMA/MDP | 15 | Faculty member              | 3 years or more    |
| 5  | Non-LAMA/MDP | 15 | Student                     | 3 years or more    |
| 6  | Non-LAMA/MDP | 6  | Faculty member              | 2 to 3 years       |
| 6  | Non-LAMA/MDP | 6  | Faculty member              | 2 to 3 years       |
| 6  | Non-LAMA/MDP | 6  | Resident, fellow or postdoc | 2 to 3 years       |
| 6  | Non-LAMA/MDP | 6  | Faculty member              | 3 years or more    |
| 13 | Non-LAMA/MDP | 10 | Faculty member              | 3 years or more    |
| 13 | Non-LAMA/MDP | 10 | Faculty member              | Less than one year |
| 13 | Non-LAMA/MDP | 10 | Faculty member              | 3 years or more    |
| 20 | Non-LAMA/MDP | 40 | Faculty member              | 3 years or more    |
| 20 | Non-LAMA/MDP | 40 | Faculty member              | 3 years or more    |
| 21 | Non-LAMA/MDP | 10 | Resident, fellow or postdoc | 3 years or more    |
| 21 | Non-LAMA/MDP | 10 | Faculty member              | 3 years or more    |
| 29 | Non-LAMA/MDP | 21 | Resident, fellow or postdoc | 3 years or more    |
| 29 | Non-LAMA/MDP | 21 | Resident, fellow or postdoc | 3 years or more    |
| 32 | Non-LAMA/MDP | 20 | Faculty member              | 3 years or more    |
| 32 | Non-LAMA/MDP | 20 | Resident, fellow or postdoc | 3 years or more    |
| 32 | Non-LAMA/MDP | 20 | Faculty member              | 1 to 2 years       |
| 40 | Non-LAMA/MDP | 42 | Faculty member              | 3 years or more    |
| 40 | Non-LAMA/MDP | 42 | Student                     | 2 to 3 years       |
| 40 | Non-LAMA/MDP | 42 | Faculty member              | 3 years or more    |
| 40 | Non-LAMA/MDP | 42 | Resident, fellow or postdoc | 3 years or more    |
| 42 | Non-LAMA/MDP | 10 | Faculty member              | 3 years or more    |
| 42 | Non-LAMA/MDP | 10 | Faculty member              | 2 to 3 years       |
| 42 | Non-LAMA/MDP | 10 | Faculty member              | 2 to 3 years       |
| 42 | Non-LAMA/MDP | 10 | Faculty member              | 2 to 3 years       |
| 42 | Non-LAMA/MDP | 10 | Faculty member              | 2 to 3 years       |
| 42 | Non-LAMA/MDP | 10 | Faculty member              | 2 to 3 years       |
| 43 | Non-LAMA/MDP | 15 | Faculty member              | 3 years or more    |
| 44 | Non-LAMA/MDP | 7  | Faculty member              | 3 years or more    |
| 47 | Non-LAMA/MDP | 7  | Faculty member              | 3 years or more    |
| 47 | Non-LAMA/MDP | 7  | Faculty member              | Less than one year |
| 47 | Non-LAMA/MDP | 7  | Faculty member              | 3 years or more    |
| 48 | Non-LAMA/MDP | 30 | Faculty member              | 3 years or more    |
| 48 | Non-LAMA/MDP | 30 | Faculty member              | 3 years or more    |
| 48 | Non-LAMA/MDP | 30 | Faculty member              | 3 years or more    |
| 48 | Non-LAMA/MDP | 30 | Resident, fellow or postdoc | 2 to 3 years       |

|    |              |    |                |                    |
|----|--------------|----|----------------|--------------------|
| 53 | Non-LAMA/MDP | 20 | Faculty member | 3 years or more    |
| 53 | Non-LAMA/MDP | 20 | Faculty member | 3 years or more    |
| 57 | Non-LAMA/MDP | 2  | Faculty member | 1 to 2 years       |
| 57 | Non-LAMA/MDP | 2  | Faculty member | 3 years or more    |
| 58 | Non-LAMA/MDP | 5  | Faculty member | 3 years or more    |
| 58 | Non-LAMA/MDP | 5  | Faculty member | Less than one year |
| 58 | Non-LAMA/MDP | 5  | Faculty member | 3 years or more    |
| 58 | Non-LAMA/MDP | 5  | Faculty member | 2 to 3 years       |

| <b>Was this mentor assigned to you or someone you found on your own?</b> | <b>What role does this mentor provide for you? (select all that apply)-<br/>Research/Scholarly Mentor Provides overall research and/or scholarly guidance.</b> |
|--------------------------------------------------------------------------|----------------------------------------------------------------------------------------------------------------------------------------------------------------|
| I found myself                                                           | Yes                                                                                                                                                            |
| I found myself                                                           | Yes                                                                                                                                                            |
| I found myself                                                           | Yes                                                                                                                                                            |
| I found myself                                                           | Yes                                                                                                                                                            |
| Other (please explain):                                                  | Yes                                                                                                                                                            |
| I found myself                                                           | Yes                                                                                                                                                            |
| I found myself                                                           | Yes                                                                                                                                                            |
| I found myself                                                           | Yes                                                                                                                                                            |
| I found myself                                                           | .                                                                                                                                                              |
| I found myself                                                           | Yes                                                                                                                                                            |
| I found myself                                                           | Yes                                                                                                                                                            |
| Assigned                                                                 | Yes                                                                                                                                                            |
| I found myself                                                           | Yes                                                                                                                                                            |
| Other (please explain):                                                  | Yes                                                                                                                                                            |
| Assigned                                                                 | Yes                                                                                                                                                            |
| I found myself                                                           | Yes                                                                                                                                                            |
| Assigned                                                                 | Yes                                                                                                                                                            |
| Other (please explain):                                                  | Yes                                                                                                                                                            |
| I found myself                                                           | .                                                                                                                                                              |
| I found myself                                                           | Yes                                                                                                                                                            |
| I found myself                                                           | Yes                                                                                                                                                            |
| I found myself                                                           | Yes                                                                                                                                                            |
| I found myself                                                           | Yes                                                                                                                                                            |
| I found myself                                                           | Yes                                                                                                                                                            |
| I found myself                                                           | .                                                                                                                                                              |
| I found myself                                                           | Yes                                                                                                                                                            |
| Other (please explain):                                                  | Yes                                                                                                                                                            |
| I found myself                                                           | Yes                                                                                                                                                            |
| I found myself                                                           | Yes                                                                                                                                                            |
| Other (please explain):                                                  | Yes                                                                                                                                                            |
| I found myself                                                           | Yes                                                                                                                                                            |
| I found myself                                                           | Yes                                                                                                                                                            |

|                         |     |
|-------------------------|-----|
| Assigned                | Yes |
| Other (please explain): | .   |
| Other (please explain): | .   |
| Assigned                | Yes |
| I found myself          | .   |
| Other (please explain): | Yes |
| I found myself          | Yes |
| I found myself          | Yes |
| I found myself          | Yes |
| I found myself          | Yes |
| I found myself          | Yes |
| Other (please explain): | Yes |
| Assigned                | Yes |
| Assigned                | .   |
| Other (please explain): | Yes |
| Other (please explain): | Yes |
| I found myself          | Yes |
| I found myself          | Yes |
| I found myself          | Yes |
| I found myself          | Yes |
| Assigned                | .   |
| Assigned                | .   |
| Assigned                | .   |
| I found myself          | Yes |
| Assigned                | Yes |
| I found myself          | Yes |
| Other (please explain): | .   |
| I found myself          | Yes |
| Assigned                | .   |
| Other (please explain): | Yes |
| I found myself          | Yes |
| I found myself          | Yes |
| I found myself          | Yes |
| Other (please explain): | Yes |
| I found myself          | Yes |
| I found myself          | .   |

|                         |     |
|-------------------------|-----|
| Other (please explain): | Yes |
| I found myself          | Yes |
| Other (please explain): | Yes |
| I found myself          | Yes |
| I found myself          | .   |
| Assigned                | .   |
| I found myself          | Yes |
| Assigned                | Yes |
| Assigned                | .   |
| Assigned                | .   |
| I found myself          | Yes |
| Assigned                | .   |
| I found myself          | Yes |
| I found myself          | Yes |
| I found myself          | Yes |
| I found myself          | Yes |
| I found myself          | Yes |
| Other (please explain): | Yes |
| I found myself          | Yes |
| I found myself          | Yes |
| I found myself          | .   |
| I found myself          | Yes |
| Assigned                | Yes |
| Other (please explain): | Yes |
| Assigned                | Yes |
| I found myself          | Yes |
| I found myself          | Yes |
| I found myself          | .   |
| I found myself          | Yes |
| Assigned                | Yes |
| I found myself          | Yes |
| I found myself          | Yes |



|                         |     |
|-------------------------|-----|
| I found myself          | Yes |
| I found myself          | Yes |
| Assigned                | .   |
| Assigned                | .   |
| I found myself          | Yes |
| I found myself          | Yes |
| I found myself          | Yes |
| I found myself          | .   |
| I found myself          | .   |
| I found myself          | Yes |
| I found myself          | .   |
| I found myself          | Yes |
| Assigned                | Yes |
| I found myself          | .   |
| I found myself          | Yes |
| Other (please explain): | Yes |
| I found myself          | Yes |
| Assigned                | Yes |
| I found myself          | .   |
| Assigned                | Yes |
| I found myself          | .   |
| I found myself          | Yes |
| I found myself          | Yes |
| I found myself          | Yes |
| Other (please explain): | Yes |
| Other (please explain): | Yes |
| Other (please explain): | Yes |
| Other (please explain): | .   |
| I found myself          | .   |
| Assigned                | Yes |
| Other (please explain): | .   |
| Assigned                | Yes |
| Assigned                | Yes |
| I found myself          | Yes |
| I found myself          | .   |
| Assigned                | Yes |
| Assigned                | .   |
| I found myself          | Yes |
| I found myself          | Yes |
| I found myself          | .   |
| Other (please explain): | .   |

|                |     |
|----------------|-----|
| I found myself | Yes |
| I found myself | Yes |
| I found myself | Yes |
| I found myself | Yes |
| I found myself | .   |
| I found myself | Yes |
| I found myself | .   |
| I found myself | Yes |





|     |     |
|-----|-----|
| .   | Yes |
| Yes | .   |
| Yes | .   |
| Yes | Yes |
| Yes | .   |
| Yes | .   |
| .   | Yes |
| Yes | Yes |
| .   | Yes |
| .   | Yes |
| .   | Yes |
| .   | Yes |
| Yes | Yes |
| Yes | Yes |
| .   | Yes |
| .   | Yes |
| .   | Yes |
| .   | Yes |
| Yes | Yes |
| Yes | Yes |
| Yes | Yes |
| Yes | Yes |
| Yes | Yes |
| .   | .   |
| Yes | Yes |
| Yes | .   |
| Yes | .   |
| .   | Yes |
| Yes | Yes |
| .   | Yes |

|     |     |
|-----|-----|
| Yes | Yes |
| .   | Yes |
| .   | Yes |
| .   | Yes |
| Yes | Yes |
| Yes | Yes |
| .   | Yes |
| Yes | Yes |
| .   | Yes |
| .   | Yes |
| .   | Yes |
| Yes | Yes |
| .   | Yes |
| .   | Yes |
| .   | Yes |
| .   | Yes |
| Yes | Yes |
| Yes | Yes |
| Yes | Yes |
| .   | Yes |
| Yes | .   |
| .   | .   |
| .   | Yes |
| .   | Yes |
| .   | Yes |
| Yes | .   |
| Yes | Yes |
| Yes | Yes |
| Yes | Yes |
| .   | Yes |
| .   | Yes |
| Yes | Yes |
| .   | Yes |
| .   | Yes |
| Yes | Yes |
| Yes | Yes |
| .   | Yes |
| .   | Yes |
| .   | Yes |
| Yes | Yes |
| Yes | Yes |
| Yes | .   |
| Yes | .   |

|     |     |
|-----|-----|
| .   | Yes |
| Yes | Yes |
| Yes | .   |
| Yes | Yes |
| Yes | Yes |
| .   | Yes |
| .   | Yes |
| Yes | Yes |

| <b>What role does this mentor provide for you? (select all that apply)-Co-Mentor or Clinical Mentor Provides specialized, content area, methodological or clinical expertise as part of a mentoring research or clinical team.</b> | <b>Please indicate how strongly you agree or disagree with the statements below. - My mentor is accessible.</b> |
|------------------------------------------------------------------------------------------------------------------------------------------------------------------------------------------------------------------------------------|-----------------------------------------------------------------------------------------------------------------|
| .                                                                                                                                                                                                                                  | Strongly Agree                                                                                                  |
| Yes                                                                                                                                                                                                                                | Agree                                                                                                           |
| .                                                                                                                                                                                                                                  | Strongly Agree                                                                                                  |
| .                                                                                                                                                                                                                                  | Strongly Agree                                                                                                  |
| .                                                                                                                                                                                                                                  | Agree                                                                                                           |
| .                                                                                                                                                                                                                                  | Strongly Agree                                                                                                  |
| Yes                                                                                                                                                                                                                                | Strongly Agree                                                                                                  |
| Yes                                                                                                                                                                                                                                | Strongly Agree                                                                                                  |
| .                                                                                                                                                                                                                                  | Strongly Agree                                                                                                  |
| .                                                                                                                                                                                                                                  | Strongly Agree                                                                                                  |
| .                                                                                                                                                                                                                                  | Strongly Agree                                                                                                  |
| Yes                                                                                                                                                                                                                                | Strongly Agree                                                                                                  |
| Yes                                                                                                                                                                                                                                | Agree                                                                                                           |
| Yes                                                                                                                                                                                                                                | Neither Disagree or Agree                                                                                       |
| .                                                                                                                                                                                                                                  | Strongly Agree                                                                                                  |
| .                                                                                                                                                                                                                                  | Strongly Agree                                                                                                  |
| .                                                                                                                                                                                                                                  | Strongly Agree                                                                                                  |
| .                                                                                                                                                                                                                                  | Agree                                                                                                           |
| .                                                                                                                                                                                                                                  | Strongly Agree                                                                                                  |
| .                                                                                                                                                                                                                                  | Strongly Agree                                                                                                  |
| .                                                                                                                                                                                                                                  | Strongly Agree                                                                                                  |
| .                                                                                                                                                                                                                                  | Strongly Agree                                                                                                  |
| .                                                                                                                                                                                                                                  | Strongly Agree                                                                                                  |
| Yes                                                                                                                                                                                                                                | Strongly Agree                                                                                                  |
| .                                                                                                                                                                                                                                  | Strongly Agree                                                                                                  |
| .                                                                                                                                                                                                                                  | Strongly Agree                                                                                                  |
| Yes                                                                                                                                                                                                                                | Strongly Agree                                                                                                  |
| .                                                                                                                                                                                                                                  | Strongly Agree                                                                                                  |
| .                                                                                                                                                                                                                                  | Agree                                                                                                           |
| .                                                                                                                                                                                                                                  | Strongly Agree                                                                                                  |
| .                                                                                                                                                                                                                                  | Agree                                                                                                           |



|     |                           |
|-----|---------------------------|
| .   | Agree                     |
| .   | Strongly Agree            |
| .   | Strongly Agree            |
| .   | Strongly Agree            |
| .   | Agree                     |
| Yes | Strongly Agree            |
| .   | Strongly Agree            |
| .   | Strongly Agree            |
| .   | Strongly Agree            |
| Yes | Strongly Agree            |
| .   | Strongly Agree            |
| .   | Agree                     |
| .   | Strongly Agree            |
| .   | Strongly Agree            |
| .   | Agree                     |
| Yes | Strongly Agree            |
| Yes | Strongly Agree            |
| Yes | Strongly Agree            |
| .   | Strongly Agree            |
| .   | Strongly Agree            |
| .   | Slightly Agree            |
| .   | Agree                     |
| .   | Agree                     |
| Yes | Strongly Agree            |
| .   | Strongly Agree            |
| .   | Strongly Agree            |
| .   | Neither Disagree or Agree |
| .   | Strongly Agree            |
| .   | Strongly Agree            |
| Yes | Strongly Agree            |
| .   | Strongly Agree            |
| .   | Neither Disagree or Agree |
| Yes | Agree                     |
| .   | Strongly Agree            |
| .   | Strongly Agree            |
| Yes | Strongly Agree            |
| .   | Strongly Agree            |

|     |                |
|-----|----------------|
| .   | Strongly Agree |
| .   | Agree          |
| .   | Strongly Agree |
| .   | Strongly Agree |
| Yes | Strongly Agree |
| .   | Agree          |
| Yes | Strongly Agree |
| .   | Strongly Agree |
| .   | Strongly Agree |
| .   | Strongly Agree |
| .   | Strongly Agree |
| .   | Agree          |
| .   | Strongly Agree |
| Yes | Strongly Agree |
| .   | Agree          |
| .   | Strongly Agree |
| .   | Strongly Agree |
| .   | Strongly Agree |
| Yes | Strongly Agree |
| .   | Strongly Agree |
| Yes | Strongly Agree |
| .   | Strongly Agree |
| .   | Strongly Agree |
| Yes | Disagree       |
| .   | Strongly Agree |
| .   | Strongly Agree |
| .   | Agree          |
| .   | Strongly Agree |
| .   | Strongly Agree |
| .   | Strongly Agree |
| Yes | Agree          |

|     |                |
|-----|----------------|
| Yes | Strongly Agree |
| .   | Agree          |
| .   | Strongly Agree |
| .   | Agree          |
| .   | Strongly Agree |
| .   | Strongly Agree |
| .   | Strongly Agree |
| .   | Slightly Agree |
| .   | Slightly Agree |
| .   | Strongly Agree |
| Yes | Strongly Agree |
| Yes | Strongly Agree |
| .   | Strongly Agree |
| Yes | Strongly Agree |
| Yes | Strongly Agree |
| Yes | Strongly Agree |
| .   | Strongly Agree |
| Yes | Strongly Agree |
| .   | Strongly Agree |
| .   | Strongly Agree |
| .   | Strongly Agree |
| .   | Agree          |
| .   | Strongly Agree |
| .   | Strongly Agree |
| .   | Strongly Agree |
| Yes | Strongly Agree |
| .   | Strongly Agree |
| .   | Strongly Agree |
| Yes | Strongly Agree |
| .   | Agree          |
| .   | Strongly Agree |
| Yes | Strongly Agree |
| .   | Strongly Agree |
| .   | Strongly Agree |
| .   | Strongly Agree |
| Yes | Agree          |
| .   | Agree          |
| .   | Strongly Agree |
| .   | Strongly Agree |
| Yes | Agree          |
| Yes | Strongly Agree |
| .   | Strongly Agree |
| Yes | Agree          |

|     |                   |
|-----|-------------------|
| Yes | Strongly Agree    |
| Yes | Strongly Agree    |
| .   | Strongly Disagree |
| Yes | Strongly Agree    |
| .   | Strongly Agree    |
| .   | Strongly Agree    |
| .   | Strongly Agree    |
| Yes | Strongly Agree    |





|                |                |
|----------------|----------------|
| Agree          | Strongly Agree |
| Agree          | Strongly Agree |
| Agree          | Strongly Agree |
| Strongly Agree | Strongly Agree |
| Strongly Agree | Strongly Agree |
| Agree          | Agree          |
| Strongly Agree | Strongly Agree |
| Strongly Agree | Strongly Agree |
| Strongly Agree | Strongly Agree |
| Strongly Agree | Strongly Agree |
| Strongly Agree | Strongly Agree |
| Agree          | Strongly Agree |
| Strongly Agree | Strongly Agree |
| Strongly Agree | Strongly Agree |
| Agree          | Agree          |
| Strongly Agree | Strongly Agree |
| Strongly Agree | Strongly Agree |
| Agree          | Strongly Agree |
| Strongly Agree | Strongly Agree |
| Strongly Agree | Strongly Agree |
| Agree          | Agree          |
| Strongly Agree | Strongly Agree |
| Agree          | Strongly Agree |
| Strongly Agree | Strongly Agree |
| Agree          | Strongly Agree |
| Agree          | Strongly Agree |
| Strongly Agree | Strongly Agree |
| Agree          | Agree          |





|                   |                   |
|-------------------|-------------------|
| Agree             | Strongly Agree    |
| Strongly Agree    | Strongly Agree    |
| Strongly Disagree | Strongly Disagree |
| Strongly Agree    | Strongly Agree    |
| Strongly Agree    | Strongly Agree    |
| Strongly Agree    | Strongly Agree    |
| Strongly Agree    | Strongly Agree    |
| Agree             | Strongly Agree    |





|                           |                   |
|---------------------------|-------------------|
| Agree                     | Strongly Agree    |
| Agree                     | Strongly Agree    |
| Agree                     | Strongly Agree    |
| Strongly Agree            | Strongly Agree    |
| .                         | Agree             |
| .                         | Agree             |
| Strongly Agree            | Strongly Agree    |
| Strongly Agree            | Strongly Agree    |
| Strongly Agree            | .                 |
| Strongly Agree            | .                 |
| Strongly Agree            | Strongly Agree    |
| Agree                     | .                 |
| Strongly Agree            | Strongly Agree    |
| Strongly Agree            | Agree             |
| Strongly Agree            | Strongly Agree    |
| Strongly Agree            | Strongly Agree    |
| Strongly Agree            | Strongly Agree    |
| Strongly Agree            | Strongly Agree    |
| Strongly Agree            | Strongly Agree    |
| Strongly Agree            | Agree             |
| Strongly Agree            | Strongly Agree    |
| Strongly Agree            | Strongly Agree    |
| Neither Disagree or Agree | Strongly Disagree |
| Strongly Agree            | Strongly Agree    |
| Agree                     | Strongly Agree    |
| Strongly Agree            | Agree             |
| Agree                     | Agree             |
| Strongly Agree            | Strongly Agree    |
| Strongly Agree            | Strongly Agree    |
| Strongly Agree            | Agree             |

|                |                           |
|----------------|---------------------------|
| Agree          | Agree                     |
| Strongly Agree | Agree                     |
| Agree          | Slightly Agree            |
| Agree          | Slightly Agree            |
| Strongly Agree | Strongly Agree            |
| Strongly Agree | Strongly Agree            |
| Strongly Agree | Strongly Agree            |
| Strongly Agree | Neither Disagree or Agree |
| Strongly Agree | Slightly Agree            |
| Strongly Agree | Slightly Agree            |
| Strongly Agree | Strongly Agree            |
| Strongly Agree | Strongly Agree            |
| Strongly Agree | Strongly Agree            |
| Agree          | Agree                     |
| Strongly Agree | Agree                     |
| Strongly Agree | .                         |
| Strongly Agree | Strongly Agree            |
| .              | Strongly Agree            |
| Strongly Agree | Strongly Agree            |
| Strongly Agree | Strongly Agree            |
| Strongly Agree | Strongly Agree            |
| Strongly Agree | Strongly Agree            |
| Agree          | Agree                     |
| Strongly Agree | Agree                     |
| Strongly Agree | .                         |
| Strongly Agree | Strongly Agree            |
| Strongly Agree | Strongly Agree            |
| Strongly Agree | Strongly Agree            |
| Strongly Agree | Strongly Agree            |
| Strongly Agree | Strongly Agree            |
| Strongly Agree | Strongly Agree            |
| Strongly Agree | Strongly Agree            |
| Strongly Agree | Strongly Agree            |
| Strongly Agree | Strongly Agree            |
| Strongly Agree | Agree                     |
| Strongly Agree | Strongly Agree            |
| Strongly Agree | Agree                     |
| Strongly Agree | Agree                     |
| Strongly Agree | Agree                     |
| Strongly Agree | Strongly Agree            |
| Strongly Agree | Strongly Agree            |
| Strongly Agree | Strongly Agree            |
| Strongly Agree | Strongly Agree            |
| Strongly Agree | Agree                     |
| Strongly Agree | Strongly Agree            |
| Strongly Agree | Strongly Agree            |
| Strongly Agree | Strongly Agree            |

|                   |                   |
|-------------------|-------------------|
| Agree             | Agree             |
| Strongly Agree    | Strongly Agree    |
| Strongly Disagree | Strongly Disagree |
| Strongly Agree    | Strongly Agree    |
| Strongly Agree    | Agree             |
| Strongly Agree    | Strongly Agree    |
| Strongly Agree    | Strongly Agree    |
| Agree             | Agree             |







|                   |                           |
|-------------------|---------------------------|
| Strongly Agree    | Strongly Agree            |
| Strongly Agree    | Agree                     |
| Strongly Agree    | Agree                     |
| Strongly Agree    | Strongly Agree            |
| Agree             | Slightly Agree            |
| Agree             | Agree                     |
| Strongly Agree    | Strongly Agree            |
| Strongly Agree    | Strongly Agree            |
| .                 | Agree                     |
| Strongly Agree    | Strongly Agree            |
| Strongly Agree    | Strongly Agree            |
| .                 | Agree                     |
| Strongly Agree    | Strongly Agree            |
| Strongly Agree    | Strongly Agree            |
| Slightly Agree    | Strongly Agree            |
| Strongly Agree    | Agree                     |
| Strongly Agree    | Strongly Agree            |
| Slightly Agree    | Agree                     |
| Strongly Agree    | Strongly Agree            |
| Agree             | Strongly Agree            |
| Agree             | Slightly Agree            |
| Strongly Agree    | Strongly Agree            |
| Strongly Agree    | Strongly Agree            |
| Strongly Disagree | Neither Disagree or Agree |
| Strongly Agree    | Strongly Agree            |
| Strongly Agree    | Strongly Agree            |
| Agree             | Agree                     |
| Agree             | Agree                     |
| Strongly Agree    | Agree                     |
| Strongly Agree    | Strongly Agree            |
| Agree             | Agree                     |



|                   |                   |
|-------------------|-------------------|
| Strongly Agree    | Strongly Agree    |
| Strongly Agree    | Strongly Agree    |
| Strongly Disagree | Strongly Disagree |
| Strongly Agree    | Strongly Agree    |
| Agree             | Strongly Agree    |
| Strongly Agree    | Strongly Agree    |
| Agree             | Agree             |
| Strongly Agree    | Agree             |









|                   |                   |
|-------------------|-------------------|
| Strongly Agree    | Strongly Agree    |
| Strongly Agree    | Strongly Agree    |
| Strongly Disagree | Strongly Disagree |
| Strongly Agree    | Strongly Agree    |
| Strongly Agree    | Strongly Agree    |
| Strongly Agree    | Strongly Agree    |
| Strongly Agree    | Strongly Agree    |
| Strongly Agree    | Strongly Agree    |



| Please indicate how strongly you agree or disagree with the statements below. -My mentor helps me to formulate clear goals. | Please indicate how strongly you agree or disagree with the statements below. -My mentor facilitates building my professional network. |
|-----------------------------------------------------------------------------------------------------------------------------|----------------------------------------------------------------------------------------------------------------------------------------|
| Agree                                                                                                                       | Strongly Agree                                                                                                                         |
| Agree                                                                                                                       | Strongly Agree                                                                                                                         |
| Agree                                                                                                                       | Strongly Agree                                                                                                                         |
| Strongly Agree                                                                                                              | Strongly Agree                                                                                                                         |
| Agree                                                                                                                       | Strongly Agree                                                                                                                         |
| Agree                                                                                                                       | Strongly Agree                                                                                                                         |
| Strongly Agree                                                                                                              | Strongly Agree                                                                                                                         |
| Strongly Agree                                                                                                              | Strongly Agree                                                                                                                         |
| Agree                                                                                                                       | Agree                                                                                                                                  |
| Strongly Agree                                                                                                              | Strongly Agree                                                                                                                         |
| Strongly Agree                                                                                                              | Agree                                                                                                                                  |
| Strongly Agree                                                                                                              | Strongly Agree                                                                                                                         |
| Strongly Agree                                                                                                              | Strongly Agree                                                                                                                         |
| Agree                                                                                                                       | Agree                                                                                                                                  |
| Strongly Agree                                                                                                              | .                                                                                                                                      |
| Strongly Agree                                                                                                              | Strongly Agree                                                                                                                         |
| Strongly Agree                                                                                                              | Strongly Agree                                                                                                                         |
| Agree                                                                                                                       | Agree                                                                                                                                  |
| Agree                                                                                                                       | Agree                                                                                                                                  |
| Agree                                                                                                                       | Slightly Agree                                                                                                                         |
| Strongly Agree                                                                                                              | Strongly Agree                                                                                                                         |
| Strongly Agree                                                                                                              | Strongly Agree                                                                                                                         |
| Agree                                                                                                                       | Agree                                                                                                                                  |
| Strongly Agree                                                                                                              | Strongly Agree                                                                                                                         |
| Agree                                                                                                                       | Strongly Agree                                                                                                                         |
| Strongly Agree                                                                                                              | Strongly Agree                                                                                                                         |
| Strongly Agree                                                                                                              | Strongly Agree                                                                                                                         |
| Agree                                                                                                                       | Agree                                                                                                                                  |
| Strongly Agree                                                                                                              | Strongly Agree                                                                                                                         |
| Agree                                                                                                                       | Agree                                                                                                                                  |
| Agree                                                                                                                       | Agree                                                                                                                                  |
| Neither Disagree or Agree                                                                                                   | Agree                                                                                                                                  |



|                           |                           |
|---------------------------|---------------------------|
| Agree                     | Agree                     |
| Agree                     | Agree                     |
| Strongly Agree            | .                         |
| Strongly Agree            | Strongly Agree            |
| Agree                     | Agree                     |
| .                         | .                         |
| Strongly Agree            | Strongly Agree            |
| Strongly Agree            | .                         |
| Agree                     | Agree                     |
| Strongly Agree            | .                         |
| Strongly Agree            | Strongly Agree            |
| Agree                     | Agree                     |
| Agree                     | Slightly Agree            |
| Strongly Agree            | Agree                     |
| Slightly Agree            | Strongly Agree            |
| Strongly Agree            | Slightly Agree            |
| Strongly Agree            | Strongly Agree            |
| Strongly Agree            | Strongly Agree            |
| Strongly Agree            | Agree                     |
| Strongly Agree            | Strongly Agree            |
| Slightly Agree            | Neither Disagree or Agree |
| Strongly Agree            | Strongly Agree            |
| Strongly Agree            | Strongly Agree            |
| Neither Disagree or Agree | Disagree                  |
| Strongly Agree            | Strongly Agree            |
| Agree                     | Strongly Agree            |
| Strongly Agree            | Strongly Agree            |
| Strongly Agree            | Strongly Agree            |
| Slightly Agree            | Agree                     |
| Strongly Agree            | Strongly Agree            |
| Agree                     | Agree                     |

|                           |                           |
|---------------------------|---------------------------|
| Agree                     | Strongly Agree            |
| Strongly Agree            | Strongly Agree            |
| Agree                     | Agree                     |
| Slightly Agree            | Agree                     |
| Strongly Agree            | Strongly Agree            |
| Strongly Agree            | Strongly Agree            |
| Strongly Agree            | Agree                     |
| Neither Disagree or Agree | Neither Disagree or Agree |
| Agree                     | Strongly Agree            |
| Strongly Agree            | Slightly Agree            |
| Strongly Agree            | Strongly Agree            |
| Strongly Agree            | Strongly Agree            |
| Strongly Agree            | Strongly Agree            |
| Strongly Agree            | Agree                     |
| Strongly Agree            | Strongly Agree            |
| Strongly Agree            | Strongly Agree            |
| Strongly Agree            | Strongly Agree            |
| Agree                     | Agree                     |
| Strongly Agree            | Strongly Agree            |
| Strongly Agree            | Strongly Agree            |
| Strongly Agree            | Strongly Agree            |
| Agree                     | Agree                     |
| Strongly Agree            | Strongly Agree            |
| Strongly Agree            | Strongly Agree            |
| Strongly Agree            | Strongly Agree            |
| Strongly Agree            | Strongly Agree            |
| Agree                     | Slightly Agree            |
| Strongly Agree            | Slightly Agree            |
| Agree                     | Agree                     |
| Strongly Agree            | Strongly Agree            |
| Strongly Agree            | Agree                     |
| Strongly Agree            | Strongly Agree            |
| Agree                     | Agree                     |
| Agree                     | Slightly Agree            |
| Strongly Agree            | Strongly Agree            |
| Agree                     | Agree                     |
| Agree                     | Strongly Agree            |
| Strongly Agree            | Strongly Agree            |
| Strongly Agree            | Strongly Agree            |
| Strongly Agree            | Agree                     |

|                   |                   |
|-------------------|-------------------|
| Agree             | Strongly Agree    |
| Strongly Agree    | Strongly Agree    |
| Strongly Disagree | Strongly Disagree |
| Strongly Agree    | Strongly Agree    |
| Strongly Agree    | Agree             |
| Strongly Agree    | Strongly Agree    |
| Slightly Agree    | Strongly Agree    |
| Agree             | Agree             |





|                   |                |
|-------------------|----------------|
| Agree             | Agree          |
| Strongly Agree    | Strongly Agree |
| Strongly Agree    | .              |
| Strongly Agree    | Strongly Agree |
| Strongly Agree    | .              |
| Agree             | Agree          |
| Strongly Agree    | Strongly Agree |
| Strongly Agree    | Strongly Agree |
| Agree             | Agree          |
| .                 | Strongly Agree |
| Strongly Agree    | Strongly Agree |
| .                 | .              |
| Agree             | Strongly Agree |
| Strongly Agree    | Strongly Agree |
| Agree             | Strongly Agree |
| Strongly Agree    | Agree          |
| Strongly Agree    | Strongly Agree |
| Slightly Agree    | Strongly Agree |
| Agree             | Agree          |
| Strongly Agree    | Strongly Agree |
| Agree             | Agree          |
| Strongly Agree    | Strongly Agree |
| Strongly Agree    | Strongly Agree |
| Strongly Disagree | .              |
| Strongly Agree    | Strongly Agree |
| Strongly Agree    | Agree          |
| Agree             | .              |
| Strongly Agree    | Strongly Agree |
| Strongly Agree    | Agree          |
| Strongly Agree    | Strongly Agree |
| Agree             | Agree          |





|                   |                   |
|-------------------|-------------------|
| Strongly Agree    | Agree             |
| Strongly Agree    | Strongly Agree    |
| Strongly Disagree | Strongly Disagree |
| Strongly Agree    | Strongly Agree    |
| Agree             | Strongly Agree    |
| Strongly Agree    | Strongly Agree    |
| Agree             | Strongly Agree    |
| Agree             | Agree             |

| Please indicate how strongly you agree or disagree with the statements below. - Overall, I am satisfied with my mentor. | Mean of Q10a-Q10m | Dichotomized-How many years has this person been your mentor? | nmiss |
|-------------------------------------------------------------------------------------------------------------------------|-------------------|---------------------------------------------------------------|-------|
| Strongly Agree                                                                                                          | 6.77              | Greater than 3 years                                          | 0     |
| Strongly Agree                                                                                                          | 6.46              | Greater than 3 years                                          | 0     |
| Strongly Agree                                                                                                          | 6.62              | Greater than 3 years                                          | 0     |
| Strongly Agree                                                                                                          | 7                 | Greater than 3 years                                          | 0     |
| Strongly Agree                                                                                                          | 6.85              | Greater than 3 years                                          | 0     |
| Strongly Agree                                                                                                          | 6.92              | Greater than 3 years                                          | 0     |
| Strongly Agree                                                                                                          | 7                 | Greater than 3 years                                          | 0     |
| Strongly Agree                                                                                                          | 7                 | Greater than 3 years                                          | 0     |
| Strongly Agree                                                                                                          | 6.7               | Greater than 3 years                                          | 3     |
| Strongly Agree                                                                                                          | 7                 | Greater than 3 years                                          | 1     |
| Strongly Agree                                                                                                          | 6.85              | Less than three years                                         | 0     |
| Strongly Agree                                                                                                          | 7                 | Greater than 3 years                                          | 0     |
| Strongly Agree                                                                                                          | 6.85              | Greater than 3 years                                          | 0     |
| Strongly Agree                                                                                                          | 6.46              | Greater than 3 years                                          | 0     |
| Strongly Agree                                                                                                          | 7                 | Greater than 3 years                                          | 4     |
| Strongly Agree                                                                                                          | 7                 | Greater than 3 years                                          | 0     |
| Strongly Agree                                                                                                          | 7                 | Greater than 3 years                                          | 0     |
| Strongly Agree                                                                                                          | 6.69              | Greater than 3 years                                          | 0     |
| Strongly Agree                                                                                                          | 6.69              | Greater than 3 years                                          | 0     |
| Agree                                                                                                                   | 6.31              | Greater than 3 years                                          | 0     |
| Strongly Agree                                                                                                          | 7                 | Greater than 3 years                                          | 0     |
| Strongly Agree                                                                                                          | 7                 | Greater than 3 years                                          | 0     |
| Strongly Agree                                                                                                          | 6.54              | Less than three years                                         | 0     |
| Strongly Agree                                                                                                          | 7                 | Greater than 3 years                                          | 0     |
| Strongly Agree                                                                                                          | 6.85              | Greater than 3 years                                          | 0     |
| Strongly Agree                                                                                                          | 6.77              | Greater than 3 years                                          | 0     |
| Strongly Agree                                                                                                          | 6.85              | Greater than 3 years                                          | 0     |
| Strongly Agree                                                                                                          | 6.46              | Greater than 3 years                                          | 0     |
| Strongly Agree                                                                                                          | 7                 | Greater than 3 years                                          | 0     |
| Strongly Agree                                                                                                          | 6                 | Greater than 3 years                                          | 0     |
| Agree                                                                                                                   | 6                 | Less than three years                                         | 0     |
| Agree                                                                                                                   | 5.69              | Less than three years                                         | 0     |

|                |      |                       |   |
|----------------|------|-----------------------|---|
| Agree          | 5.85 | Greater than 3 years  | 0 |
| Strongly Agree | 6.77 | Greater than 3 years  | 0 |
| Strongly Agree | 7    | Greater than 3 years  | 2 |
| Strongly Agree | 7    | Less than three years | 0 |
| Strongly Agree | 6.38 | Greater than 3 years  | 0 |
| Strongly Agree | 7    | Greater than 3 years  | 0 |
| Strongly Agree | 7    | Greater than 3 years  | 0 |
| Strongly Agree | 7    | Greater than 3 years  | 0 |
| Strongly Agree | 6.85 | Greater than 3 years  | 0 |
| Strongly Agree | 6.85 | Greater than 3 years  | 0 |
| Strongly Agree | 7    | Greater than 3 years  | 0 |
| Agree          | 6    | Less than three years | 0 |
| Strongly Agree | 6.77 | Greater than 3 years  | 0 |
| Strongly Agree | 6.85 | Greater than 3 years  | 0 |
| Strongly Agree | 6.77 | Greater than 3 years  | 0 |
| Strongly Agree | 6.85 | Less than three years | 0 |
| Strongly Agree | 7    | Greater than 3 years  | 0 |
| Strongly Agree | 7    | Greater than 3 years  | 0 |
| Strongly Agree | 7    | Greater than 3 years  | 0 |
| Strongly Agree | 6.54 | Less than three years | 0 |
| Strongly Agree | 6.67 | Less than three years | 1 |
| Agree          | 6.15 | Less than three years | 0 |
| Strongly Agree | 7    | Less than three years | 0 |
| Strongly Agree | 6.69 | Less than three years | 0 |
| Strongly Agree | 7    | Greater than 3 years  | 0 |
| Slightly Agree | 4.54 | Less than three years | 0 |
| Strongly Agree | 6.69 | Greater than 3 years  | 0 |
| Strongly Agree | 7    | Greater than 3 years  | 0 |
| Strongly Agree | 6.62 | Less than three years | 0 |
| Strongly Agree | 7    | Greater than 3 years  | 0 |
| Agree          | 6.15 | Greater than 3 years  | 0 |
| Strongly Agree | 6.31 | Greater than 3 years  | 0 |
| Strongly Agree | 7    | Greater than 3 years  | 0 |
| Strongly Agree | 7    | Greater than 3 years  | 0 |
| Strongly Agree | 7    | Greater than 3 years  | 0 |
| Strongly Agree | 6    | Less than three years | 0 |

|                |      |                       |   |
|----------------|------|-----------------------|---|
| Agree          | 6.38 | Less than three years | 0 |
| Strongly Agree | 6.46 | Less than three years | 0 |
| Agree          | 6.55 | Greater than 3 years  | 2 |
| Strongly Agree | 7    | Less than three years | 0 |
| Strongly Agree | 6.18 | Greater than 3 years  | 2 |
| Agree          | 6    | Less than three years | 3 |
| Strongly Agree | 7    | Greater than 3 years  | 0 |
| Strongly Agree | 7    | Less than three years | 1 |
| Agree          | 6.4  | Less than three years | 3 |
| Strongly Agree | 7    | Less than three years | 3 |
| Strongly Agree | 7    | Greater than 3 years  | 0 |
| Strongly Agree | 6.13 | Less than three years | 5 |
| Strongly Agree | 6.69 | Greater than 3 years  | 0 |
| Strongly Agree | 6.85 | Greater than 3 years  | 0 |
| Slightly Agree | 6.46 | Greater than 3 years  | 0 |
| Strongly Agree | 6.69 | Greater than 3 years  | 0 |
| Strongly Agree | 7    | Greater than 3 years  | 0 |
| Strongly Agree | 6.38 | Greater than 3 years  | 0 |
| Strongly Agree | 6.69 | Less than three years | 0 |
| Strongly Agree | 6.85 | Less than three years | 0 |
| Agree          | 6    | Less than three years | 0 |
| Strongly Agree | 7    | Less than three years | 0 |
| Strongly Agree | 7    | Greater than 3 years  | 0 |
| Disagree       | 3.25 | Less than three years | 1 |
| Strongly Agree | 7    | Less than three years | 0 |
| Strongly Agree | 6.69 | Less than three years | 0 |
| Strongly Agree | 6.58 | Less than three years | 1 |
| Strongly Agree | 6.54 | Less than three years | 0 |
| Strongly Agree | 6.54 | Greater than 3 years  | 0 |
| Strongly Agree | 7    | Less than three years | 0 |
| Agree          | 6.15 | Less than three years | 0 |

|                           |      |                       |   |
|---------------------------|------|-----------------------|---|
| Strongly Agree            | 6.46 | Greater than 3 years  | 0 |
| Strongly Agree            | 6.69 | Greater than 3 years  | 0 |
| Agree                     | 6.31 | Less than three years | 0 |
| Slightly Agree            | 5.75 | Greater than 3 years  | 1 |
| Strongly Agree            | 6.92 | Greater than 3 years  | 0 |
| Strongly Agree            | 7    | Greater than 3 years  | 0 |
| Strongly Agree            | 6.85 | Greater than 3 years  | 0 |
| Neither Disagree or Agree | 4.62 | Greater than 3 years  | 0 |
| Strongly Agree            | 6.23 | Greater than 3 years  | 0 |
| Strongly Agree            | 6.62 | Less than three years | 0 |
| Strongly Agree            | 7    | Less than three years | 0 |
| Strongly Agree            | 7    | Less than three years | 0 |
| Strongly Agree            | 7    | Greater than 3 years  | 0 |
| Strongly Agree            | 6.69 | Greater than 3 years  | 0 |
| Strongly Agree            | 6.85 | Less than three years | 0 |
| Strongly Agree            | 6.91 | Greater than 3 years  | 2 |
| Strongly Agree            | 7    | Greater than 3 years  | 0 |
| Strongly Agree            | 6.75 | Greater than 3 years  | 1 |
| Strongly Agree            | 7    | Greater than 3 years  | 0 |
| Strongly Agree            | 7    | Greater than 3 years  | 0 |
| Strongly Agree            | 6.92 | Greater than 3 years  | 0 |
| Agree                     | 6    | Greater than 3 years  | 0 |
| Strongly Agree            | 6.85 | Greater than 3 years  | 0 |
| Strongly Agree            | 7    | Greater than 3 years  | 2 |
| Strongly Agree            | 7    | Less than three years | 0 |
| Strongly Agree            | 6.62 | Greater than 3 years  | 0 |
| Strongly Agree            | 7    | Less than three years | 0 |
| Strongly Agree            | 6.92 | Greater than 3 years  | 0 |
| Strongly Agree            | 7    | Greater than 3 years  | 0 |
| Strongly Agree            | 6.38 | Greater than 3 years  | 0 |
| Strongly Agree            | 6.62 | Less than three years | 0 |
| Strongly Agree            | 6.69 | Less than three years | 0 |
| Strongly Agree            | 7    | Less than three years | 1 |
| Strongly Agree            | 6.69 | Less than three years | 0 |
| Strongly Agree            | 6.85 | Greater than 3 years  | 0 |
| Strongly Agree            | 6.38 | Greater than 3 years  | 0 |
| Strongly Agree            | 6.46 | Greater than 3 years  | 0 |
| Strongly Agree            | 7    | Less than three years | 0 |
| Strongly Agree            | 6.85 | Greater than 3 years  | 0 |
| Strongly Agree            | 6.69 | Greater than 3 years  | 0 |
| Strongly Agree            | 7    | Greater than 3 years  | 0 |
| Strongly Agree            | 7    | Greater than 3 years  | 0 |
| Strongly Agree            | 6.83 | Less than three years | 1 |

|                   |      |                       |   |
|-------------------|------|-----------------------|---|
| Strongly Agree    | 6.62 | Greater than 3 years  | 0 |
| Strongly Agree    | 7    | Greater than 3 years  | 0 |
| Strongly Disagree | 1    | Less than three years | 0 |
| Strongly Agree    | 7    | Greater than 3 years  | 0 |
| Strongly Agree    | 6.69 | Greater than 3 years  | 0 |
| Strongly Agree    | 7    | Less than three years | 0 |
| Strongly Agree    | 6.62 | Greater than 3 years  | 0 |
| Strongly Agree    | 6.38 | Less than three years | 0 |





|   |   |   |   |   |
|---|---|---|---|---|
| 2 | 0 | 3 | 2 | 2 |
| 3 | 2 | 3 | 3 | 3 |
| 3 | 3 | 3 | 3 | 3 |
| 3 | 3 | 3 | 3 | 3 |
| 2 | 2 | 3 | 3 | 1 |
| 3 | 3 | 3 | 3 | 3 |
| 3 | 3 | 3 | 3 | 3 |
| 3 | 3 | 3 | 3 | 3 |
| 3 | 3 | 3 | 3 | 3 |
| 3 | 3 | 3 | 3 | 3 |
| 2 | 2 | 2 | 2 | 2 |
| 3 | 3 | 3 | 3 | 3 |
| 3 | 3 | 3 | 3 | 3 |
| 2 | 2 | 3 | 3 | 3 |
| 3 | 3 | 3 | 3 | 3 |
| 3 | 3 | 3 | 3 | 3 |
| 3 | 3 | 3 | 3 | 3 |
| 3 | 3 | 3 | 3 | 3 |
| 3 | 3 | 3 | 3 | 3 |
| 3 | 3 | 3 | 3 | 3 |
| 3 | 3 | 3 | 3 | 3 |
| 3 | 3 | 3 | 3 | 3 |
| 3 | 3 | 3 | 3 | 3 |
| 3 | 3 | 3 | 3 | 3 |
| 1 | 3 | 3 | 3 | 3 |
| 2 | 3 | 3 | 3 | 3 |
| 2 | 3 | 2 | 2 | 2 |
| 3 | 3 | 3 | 3 | 3 |
| 3 | 3 | 3 | 3 | 3 |
| 3 | 3 | 3 | 3 | 3 |
| 0 | 1 | 2 | 1 | 0 |
| 3 | 2 | 3 | 3 | 3 |
| 3 | 3 | 3 | 3 | 3 |
| 3 | 3 | 3 | 3 | 1 |
| 3 | 3 | 3 | 3 | 3 |
| 0 | 2 | 3 | 2 | 3 |
| 2 | 2 | 3 | 2 | 2 |
| 3 | 3 | 3 | 3 | 3 |
| 3 | 3 | 3 | 3 | 3 |
| 3 | 3 | 3 | 3 | 3 |
| 3 | 3 | 3 | 3 | 3 |
| 3 | 3 | 3 | 2 | 2 |

|    |   |   |   |    |
|----|---|---|---|----|
| 3  | 2 | 3 | 2 | 3  |
| 2  | 2 | 3 | 2 | 3  |
| 3  | 2 | 3 | 2 | 3  |
| 3  | 3 | 3 | 3 | 3  |
| 3  | 3 | 3 |   | 2  |
| 2  | 2 | 2 |   | 2  |
| 3  | 3 | 3 | 3 | 3  |
| 3  | 3 | 3 | 3 | 3  |
| 3  | 3 | 3 | 3 |    |
| 3  | 3 | 3 | 3 |    |
| 3  | 3 | 3 | 3 | 3  |
| 2  | 2 | 3 | 2 |    |
| 3  | 3 | 3 | 3 | 3  |
| 3  | 3 | 3 | 3 | 2  |
| 2  | 2 | 3 | 3 | 3  |
| 3  | 3 | 3 | 3 | 3  |
| 3  | 3 | 3 | 3 | 3  |
| 3  | 3 | 3 | 3 | 3  |
| 3  | 2 | 3 | 3 | 3  |
| 3  | 3 | 3 | 3 | 3  |
| 3  | 2 | 2 | 3 | 2  |
| 3  | 3 | 3 | 3 | 3  |
| 3  | 3 | 3 | 3 | 3  |
| -2 | 2 | 2 | 0 | -3 |
| 3  | 3 | 3 | 3 | 3  |
| 3  | 2 | 3 | 2 | 3  |
| 2  | 3 | 3 | 3 | 2  |
| 3  | 2 | 3 | 2 | 2  |
| 3  | 2 | 3 | 3 | 3  |
| 3  | 3 | 3 | 3 | 3  |
| 2  | 2 | 2 | 3 | 2  |

|   |   |   |   |   |
|---|---|---|---|---|
| 3 | 3 | 3 | 2 | 2 |
| 2 | 2 | 3 | 3 | 2 |
| 3 | 3 | 3 | 2 | 1 |
| 2 | 2 | 2 | 2 | 1 |
| 3 | 3 | 3 | 3 | 3 |
| 3 | 3 | 3 | 3 | 3 |
| 3 | 3 | 3 | 3 | 3 |
| 1 | 0 | 1 | 3 | 0 |
| 1 | 2 | 3 | 3 | 1 |
| 3 | 3 | 3 | 3 | 1 |
| 3 | 3 | 3 | 3 | 3 |
| 3 | 3 | 3 | 3 | 3 |
| 3 | 3 | 3 | 3 | 3 |
| 3 | 3 | 3 | 2 | 2 |
| 3 | 3 | 3 | 3 | 2 |
| 3 | 3 | 3 | 3 |   |
| 3 | 3 | 3 | 3 | 3 |
| 3 | 3 | 3 |   | 3 |
| 3 | 3 | 3 | 3 | 3 |
| 3 | 3 | 3 | 3 | 3 |
| 3 | 3 | 3 | 3 | 3 |
| 2 | 2 | 2 | 2 | 2 |
| 3 | 3 | 3 | 3 | 2 |
| 3 | 3 | 3 | 3 |   |
| 3 | 3 | 3 | 3 | 3 |
| 3 | 2 | 3 | 3 | 3 |
| 3 | 3 | 3 | 3 | 3 |
| 3 | 3 | 3 | 3 | 3 |
| 3 | 3 | 3 | 3 | 3 |
| 2 | 3 | 3 | 3 | 3 |
| 3 | 2 | 3 | 3 | 3 |
| 3 | 3 | 3 | 3 | 2 |
| 3 | 3 | 3 | 3 | 3 |
| 3 | 3 | 3 | 3 | 2 |
| 3 | 3 | 3 | 3 | 2 |
| 2 | 3 | 3 | 3 | 2 |
| 2 | 3 | 3 | 3 | 3 |
| 3 | 3 | 3 | 3 | 3 |
| 3 | 3 | 3 | 3 | 3 |
| 2 | 2 | 3 | 3 | 2 |
| 3 | 3 | 3 | 3 | 3 |
| 3 | 3 | 3 | 3 | 3 |
| 2 | 3 | 3 | 3 | 3 |

|    |    |    |    |    |
|----|----|----|----|----|
| 3  | 2  | 3  | 2  | 2  |
| 3  | 3  | 3  | 3  | 3  |
| -3 | -3 | -3 | -3 | -3 |
| 3  | 3  | 3  | 3  | 3  |
| 3  | 3  | 3  | 3  | 2  |
| 3  | 3  | 3  | 3  | 3  |
| 3  | 3  | 3  | 3  | 3  |
| 3  | 2  | 3  | 2  | 2  |

| q10_motivates_6 | q10_direction_7 | q10_acknowledges_8 | q10_interest_9 | q10_goals_10 |
|-----------------|-----------------|--------------------|----------------|--------------|
| 3               | 3               | 3                  | 3              | 2            |
| 2               | 2               | 3                  | 3              | 2            |
| 2               | 3               | 3                  | 3              | 2            |
| 3               | 3               | 3                  | 3              | 3            |
| 3               | 3               | 3                  | 3              | 2            |
| 3               | 3               | 3                  | 3              | 2            |
| 3               | 3               | 3                  | 3              | 3            |
| 3               | 3               | 3                  | 3              | 3            |
| 3               | 3               | 3                  | 3              | 3            |
| 3               | 3               | 3                  | 2              | 2            |
| 3               | 3               | 3                  | 3              | 3            |
| 3               | 3               | 3                  | 3              | 3            |
| 3               | 3               | 3                  | 3              | 3            |
| 3               | 3               | 3                  | 3              | 3            |
| 2               | 3               | 3                  | 3              | 3            |
| 3               | 3               | 3                  | 3              | 2            |
|                 | 3               |                    | 3              | 3            |
| 3               | 3               | 3                  | 3              | 3            |
| 3               | 3               | 3                  | 3              | 3            |
| 3               | 2               | 3                  | 3              | 2            |
| 2               | 3               | 3                  | 3              | 2            |
| 2               | 3               | 2                  | 2              | 2            |
| 3               | 3               | 3                  | 3              | 3            |
| 3               | 3               | 3                  | 3              | 3            |
| 2               | 3               | 2                  | 3              | 2            |
| 3               | 3               | 3                  | 3              | 3            |
| 3               | 3               | 3                  | 3              | 2            |
| 3               | 3               | 3                  | 3              | 3            |
| 3               | 3               | 3                  | 3              | 3            |
| 3               | 2               | 2                  | 3              | 2            |
| 3               | 3               | 3                  | 3              | 3            |
| 2               | 2               | 2                  | 2              | 2            |
| 1               | 2               | 3                  | 3              | 2            |
| 1               | 2               | 3                  | 3              | 0            |

|   |   |   |   |   |
|---|---|---|---|---|
| 2 | 2 | 2 | 3 | 2 |
| 2 | 3 | 3 | 3 | 2 |
| 3 | 3 | 3 | 3 | 3 |
| 3 | 3 | 3 | 3 | 3 |
| 1 | 3 | 2 | 3 | 3 |
| 3 | 3 | 3 | 3 | 3 |
| 3 | 3 | 3 | 3 | 3 |
| 3 | 3 | 3 | 3 | 3 |
| 3 | 3 | 3 | 3 | 2 |
| 3 | 3 | 3 | 3 | 3 |
| 3 | 3 | 3 | 3 | 3 |
| 2 | 2 | 2 | 2 | 2 |
| 3 | 3 | 3 | 3 | 2 |
| 3 | 3 | 3 | 3 | 3 |
| 3 | 2 | 3 | 3 | 3 |
| 3 | 2 | 3 | 3 | 3 |
| 3 | 3 | 3 | 3 | 3 |
| 3 | 3 | 3 | 3 | 3 |
| 3 | 3 | 3 | 3 | 3 |
| 3 | 3 | 3 | 3 | 3 |
| 3 | 2 | 2 | 2 | 3 |
| 2 | 3 | 3 | 3 | 3 |
| 2 | 2 | 2 | 3 | 2 |
| 3 | 3 | 3 | 3 | 3 |
| 3 | 3 | 3 | 3 | 1 |
| 3 | 3 | 3 | 3 | 3 |
| 1 | 0 | 1 | 0 | 2 |
| 2 | 2 | 3 | 3 | 2 |
| 3 | 3 | 3 | 3 | 3 |
| 2 | 3 | 2 | 3 | 3 |
| 3 | 3 | 3 | 3 | 3 |
| 2 | 1 | 3 | 3 | 2 |
| 3 | 3 | 3 | 2 | 2 |
| 3 | 3 | 3 | 3 | 3 |
| 3 | 3 | 3 | 3 | 3 |
| 3 | 3 | 3 | 3 | 3 |
| 2 | 2 | 3 | 1 | 2 |

|    |   |   |    |   |
|----|---|---|----|---|
| 3  | 3 | 2 | 2  | 2 |
| 3  | 2 | 3 | 2  | 2 |
| 3  | 2 | 2 | 2  | 3 |
| 3  | 3 | 3 | 3  | 3 |
| 2  | 1 | 2 | 1  | 2 |
| 2  | 2 | 2 | 2  |   |
| 3  | 3 | 3 | 3  | 3 |
| 3  | 3 | 3 | 3  | 3 |
|    | 2 |   | 2  | 2 |
| 3  | 3 | 3 | 3  | 3 |
| 3  | 3 | 3 | 3  | 3 |
|    | 2 |   | 2  | 2 |
| 3  | 3 | 3 | 3  | 2 |
| 3  | 3 | 3 | 3  | 3 |
| 1  | 3 | 3 | 3  | 1 |
| 3  | 2 | 3 | 3  | 3 |
| 3  | 3 | 3 | 3  | 3 |
| 1  | 2 | 3 | 3  | 3 |
| 3  | 3 | 2 | 3  | 3 |
| 2  | 3 | 3 | 3  | 3 |
| 2  | 1 | 2 | 3  | 1 |
| 3  | 3 | 3 | 3  | 3 |
| 3  | 3 | 3 | 3  | 3 |
| -3 | 0 | 2 | -2 | 0 |
| 3  | 3 | 3 | 3  | 3 |
| 3  | 3 | 3 | 3  | 2 |
| 2  | 2 | 3 | 3  | 3 |
| 2  | 2 | 2 | 3  | 3 |
| 3  | 2 | 3 | 3  | 1 |
| 3  | 3 | 3 | 3  | 3 |
| 2  | 2 | 2 | 3  | 2 |

|   |   |   |   |   |
|---|---|---|---|---|
| 2 | 3 | 2 | 2 | 2 |
| 3 | 3 | 3 | 3 | 3 |
| 2 | 2 | 3 | 3 | 2 |
| 1 | 2 | 2 | 2 | 1 |
| 3 | 3 | 2 | 3 | 3 |
| 3 | 3 | 3 | 3 | 3 |
| 3 | 3 | 3 | 3 | 3 |
| 0 | 0 | 0 | 1 | 0 |
| 2 | 1 | 3 | 3 | 2 |
| 3 | 3 | 2 | 3 | 3 |
| 3 | 3 | 3 | 3 | 3 |
| 3 | 3 | 3 | 3 | 3 |
| 3 | 3 | 3 | 3 | 3 |
| 2 | 3 | 3 | 3 | 3 |
| 2 | 3 | 3 | 3 | 3 |
| 2 | 3 | 3 | 3 | 3 |
| 3 | 3 | 3 | 3 | 3 |
| 2 | 3 | 3 | 3 | 2 |
| 3 | 3 | 3 | 3 | 3 |
| 3 | 3 | 3 | 3 | 3 |
| 2 | 3 | 3 | 3 | 3 |
| 2 | 2 | 2 | 2 | 2 |
| 2 | 3 | 3 | 3 | 3 |
| 3 | 3 |   | 3 | 3 |
| 3 | 3 | 3 | 3 | 3 |
| 3 | 3 | 3 | 3 | 2 |
| 3 | 3 | 3 | 3 | 3 |
| 3 | 3 | 3 | 3 | 3 |
| 3 | 3 | 3 | 3 | 3 |
| 3 | 3 | 3 | 3 | 3 |
| 3 | 1 | 2 | 3 | 2 |
| 2 | 2 | 3 | 3 | 3 |
| 2 | 3 | 3 | 3 | 2 |
| 3 | 3 | 3 | 3 | 3 |
| 3 | 2 | 3 | 3 | 3 |
| 2 | 3 | 3 | 3 | 3 |
| 1 | 2 | 3 | 3 | 2 |
| 3 | 3 | 3 | 3 | 2 |
| 3 | 3 | 3 | 3 | 3 |
| 3 | 3 | 3 | 3 | 2 |
| 3 | 3 | 3 | 3 | 2 |
| 3 | 3 | 3 | 3 | 3 |
| 3 | 3 | 3 | 3 | 3 |
| 3 | 3 | 3 | 3 | 3 |
| 3 |   | 3 | 3 | 3 |



|    |    |    |    |    |
|----|----|----|----|----|
| 3  | 3  | 3  | 3  | 2  |
| 3  | 3  | 3  | 3  | 3  |
| -3 | -3 | -3 | -3 | -3 |
| 3  | 3  | 3  | 3  | 3  |
| 2  | 3  | 3  | 3  | 3  |
| 3  | 3  | 3  | 3  | 3  |
| 2  | 2  | 3  | 3  | 1  |
| 3  | 2  | 3  | 3  | 2  |

| q10_network_11 | q10_advice_12 | q10_balance_13 | q10_overall | Mean Mentor Score (-3,-2,-1,0,1,2,3) |
|----------------|---------------|----------------|-------------|--------------------------------------|
| 3              | 3             | 2              | 3           | 2.77                                 |
| 3              | 2             | 3              | 3           | 2.46                                 |
| 3              | 2             | 2              | 3           | 2.62                                 |
| 3              | 3             | 3              | 3           | 3.00                                 |
| 3              | 3             | 3              | 3           | 2.85                                 |
| 3              | 3             | 3              | 3           | 2.92                                 |
| 3              | 3             | 3              | 3           | 3.00                                 |
| 3              | 3             | 3              | 3           | 3.00                                 |
| 2              |               | 3              | 3           | 2.70                                 |
| 3              | 3             |                | 3           | 3.00                                 |
| 2              | 3             | 2              | 3           | 2.85                                 |
| 3              | 3             | 3              | 3           | 3.00                                 |
| 3              | 3             | 3              | 3           | 2.85                                 |
| 2              | 3             | 3              | 3           | 2.46                                 |
|                | 3             |                | 3           | 3.00                                 |
| 3              | 3             | 3              | 3           | 3.00                                 |
| 3              | 3             | 3              | 3           | 3.00                                 |
| 2              | 3             | 3              | 3           | 2.69                                 |
| 2              | 2             | 3              | 3           | 2.69                                 |
| 1              | 2             | 2              | 2           | 2.31                                 |
| 3              | 3             | 3              | 3           | 3.00                                 |
| 3              | 3             | 3              | 3           | 3.00                                 |
| 2              | 3             | 3              | 3           | 2.54                                 |
| 3              | 3             | 3              | 3           | 3.00                                 |
| 3              | 3             | 2              | 3           | 2.85                                 |
| 3              | 3             | 1              | 3           | 2.77                                 |
| 3              | 3             | 1              | 3           | 2.85                                 |
| 2              | 3             | 2              | 3           | 2.46                                 |
| 3              | 3             | 3              | 3           | 3.00                                 |
| 2              | 1             | 3              | 3           | 2.00                                 |
| 2              | 0             | 3              | 2           | 2.00                                 |
| 2              | -1            | 2              | 2           | 1.69                                 |

|    |   |   |   |      |
|----|---|---|---|------|
| 2  | 2 | 0 | 2 | 1.85 |
| 3  | 3 | 3 | 3 | 2.77 |
| 3  |   |   | 3 | 3.00 |
| 3  | 3 | 3 | 3 | 3.00 |
| 3  | 2 | 3 | 3 | 2.38 |
| 3  | 3 | 3 | 3 | 3.00 |
| 3  | 3 | 3 | 3 | 3.00 |
| 3  | 3 | 3 | 3 | 3.00 |
| 2  | 3 | 3 | 3 | 2.85 |
| 1  | 3 | 3 | 3 | 2.85 |
| 3  | 3 | 3 | 3 | 3.00 |
| 2  | 2 | 2 | 2 | 2.00 |
| 2  | 2 | 3 | 3 | 2.77 |
| 2  | 3 | 2 | 3 | 2.85 |
| 3  | 3 | 3 | 3 | 2.77 |
| 3  | 3 | 2 | 3 | 2.85 |
| 3  | 3 | 3 | 3 | 3.00 |
| 3  | 3 | 3 | 3 | 3.00 |
| 3  | 3 | 3 | 3 | 3.00 |
| 2  | 3 | 3 | 3 | 2.54 |
| 2  |   | 2 | 3 | 2.67 |
| 2  | 2 | 2 | 2 | 2.15 |
| 3  | 3 | 3 | 3 | 3.00 |
| 1  | 3 | 3 | 3 | 2.69 |
| 3  | 3 | 3 | 3 | 3.00 |
| -1 | 0 | 0 | 1 | 0.54 |
| 3  | 3 | 3 | 3 | 2.69 |
| 3  | 3 | 3 | 3 | 3.00 |
| 3  | 3 | 2 | 3 | 2.62 |
| 3  | 3 | 3 | 3 | 3.00 |
| 2  | 2 | 3 | 2 | 2.15 |
| 2  | 2 | 2 | 3 | 2.31 |
| 3  | 3 | 3 | 3 | 3.00 |
| 3  | 3 | 3 | 3 | 3.00 |
| 3  | 3 | 3 | 3 | 3.00 |
| 0  | 3 | 0 | 3 | 2.00 |

|    |    |   |    |       |
|----|----|---|----|-------|
| 2  | 2  | 2 | 2  | 2.38  |
| 2  | 3  | 3 | 3  | 2.46  |
| .  | 3  | . | 2  | 2.55  |
| 3  | 3  | 3 | 3  | 3.00  |
| 2  | 3  | . | 3  | 2.18  |
| .  | 2  | 2 | 2  | 2.00  |
| 3  | 3  | 3 | 3  | 3.00  |
| .  | 3  | 3 | 3  | 3.00  |
| 2  | 2  | 2 | 2  | 2.40  |
| .  | .  | 3 | 3  | 3.00  |
| 3  | 3  | 3 | 3  | 3.00  |
| 2  | .  | . | 3  | 2.13  |
| 1  | 2  | 3 | 3  | 2.69  |
| 2  | 3  | 3 | 3  | 2.85  |
| 3  | 2  | 3 | 1  | 2.46  |
| 1  | 3  | 2 | 3  | 2.69  |
| 3  | 3  | 3 | 3  | 3.00  |
| 3  | 1  | 3 | 3  | 2.38  |
| 2  | 2  | 2 | 3  | 2.69  |
| 3  | 3  | 3 | 3  | 2.85  |
| 0  | 2  | 2 | 2  | 2.00  |
| 3  | 3  | 3 | 3  | 3.00  |
| 3  | 3  | 3 | 3  | 3.00  |
| -2 | -3 | . | -2 | -0.75 |
| 3  | 3  | 3 | 3  | 3.00  |
| 3  | 3  | 2 | 3  | 2.69  |
| 3  | 2  | . | 3  | 2.58  |
| 3  | 3  | 3 | 3  | 2.54  |
| 2  | 3  | 2 | 3  | 2.54  |
| 3  | 3  | 3 | 3  | 3.00  |
| 2  | 2  | 2 | 2  | 2.15  |

|   |   |   |   |      |
|---|---|---|---|------|
| 3 | 2 | 3 | 3 | 2.46 |
| 3 | 3 | 2 | 3 | 2.69 |
| 2 | 1 | 3 | 2 | 2.31 |
| 2 |   | 2 | 1 | 1.75 |
| 3 | 3 | 3 | 3 | 2.92 |
| 3 | 3 | 3 | 3 | 3.00 |
| 2 | 2 | 3 | 3 | 2.85 |
| 0 | 0 | 2 | 0 | 0.62 |
| 3 | 2 | 3 | 3 | 2.23 |
| 1 | 3 | 3 | 3 | 2.62 |
| 3 | 3 | 3 | 3 | 3.00 |
| 3 | 3 | 3 | 3 | 3.00 |
| 3 | 3 | 3 | 3 | 3.00 |
| 2 | 3 | 3 | 3 | 2.69 |
| 3 | 3 | 3 | 3 | 2.85 |
| 3 |   | 3 | 3 | 2.91 |
| 3 | 3 | 3 | 3 | 3.00 |
| 2 | 3 | 3 | 3 | 2.75 |
| 3 | 3 | 3 | 3 | 3.00 |
| 3 | 3 | 3 | 3 | 3.00 |
| 3 | 3 | 3 | 3 | 3.00 |
| 3 | 3 | 3 | 3 | 2.92 |
| 2 | 2 | 2 | 2 | 2.00 |
| 3 | 3 | 3 | 3 | 2.85 |
| 3 | 3 | 3 | 3 | 3.00 |
| 3 | 3 | 3 | 3 | 3.00 |
| 2 | 3 | 1 | 3 | 2.62 |
| 3 | 3 | 3 | 3 | 3.00 |
| 3 | 3 | 2 | 3 | 2.92 |
| 3 | 3 | 3 | 3 | 3.00 |
| 1 | 2 | 3 | 3 | 2.38 |
| 1 | 3 | 3 | 3 | 2.62 |
| 2 | 3 | 3 | 3 | 2.69 |
| 3 |   | 3 | 3 | 3.00 |
| 2 | 2 | 3 | 3 | 2.69 |
| 3 | 3 | 3 | 3 | 2.85 |
| 2 | 2 | 3 | 3 | 2.38 |
| 1 | 0 | 3 | 3 | 2.46 |
| 3 | 3 | 3 | 3 | 3.00 |
| 2 | 3 | 3 | 3 | 2.85 |
| 3 | 3 | 3 | 3 | 2.69 |
| 3 | 3 | 3 | 3 | 3.00 |
| 3 | 3 | 3 | 3 | 3.00 |
| 2 | 3 | 3 | 3 | 2.83 |

|    |    |    |    |       |
|----|----|----|----|-------|
| 3  | 3  | 2  | 3  | 2.62  |
| 3  | 3  | 3  | 3  | 3.00  |
| -3 | -3 | -3 | -3 | -3.00 |
| 3  | 3  | 3  | 3  | 3.00  |
| 2  | 2  | 3  | 3  | 2.69  |
| 3  | 3  | 3  | 3  | 3.00  |
| 3  | 2  | 3  | 3  | 2.62  |
| 2  | 2  | 2  | 3  | 2.38  |

**Mean Mentor Score  
(1,2,3,4,5,6,7)**

|      |
|------|
| 6.77 |
| 6.46 |
| 6.62 |
| 7.00 |
| 6.85 |
| 6.92 |
| 7.00 |
| 7.00 |
| 6.70 |
| 7.00 |
| 6.85 |
| 7.00 |
| 6.85 |
| 6.46 |
| 7.00 |
| 7.00 |
| 7.00 |
| 7.00 |
| 6.69 |
| 6.69 |
| 6.31 |
| 7.00 |
| 7.00 |
| 6.54 |
| 7.00 |
| 6.85 |
| 6.77 |
| 6.85 |
| 6.46 |
| 7.00 |
| 6.00 |
| 6.00 |
| 5.69 |

|      |
|------|
| 5.85 |
| 6.77 |
| 7.00 |
| 7.00 |
| 6.38 |
| 7.00 |
| 7.00 |
| 7.00 |
| 6.85 |
| 6.85 |
| 7.00 |
| 6.00 |
| 6.77 |
| 6.85 |
| 6.77 |
| 6.85 |
| 7.00 |
| 7.00 |
| 7.00 |
| 7.00 |
| 6.54 |
| 6.67 |
| 6.15 |
| 7.00 |
| 6.69 |
| 7.00 |
| 4.54 |
| 6.69 |
| 7.00 |
| 6.62 |
| 7.00 |
| 6.15 |
| 6.31 |
| 7.00 |
| 7.00 |
| 7.00 |
| 6.00 |



|      |
|------|
| 6.38 |
| 6.46 |
| 6.55 |
| 7.00 |
| 6.18 |
| 6.00 |
| 7.00 |
| 7.00 |
| 6.40 |
| 7.00 |
| 7.00 |
| 6.13 |
| 6.69 |
| 6.85 |
| 6.46 |
| 6.69 |
| 7.00 |
| 6.38 |
| 6.69 |
| 6.85 |
| 6.00 |
| 7.00 |
| 7.00 |
| 3.25 |
| 7.00 |
| 6.69 |
| 6.58 |
| 6.54 |
| 6.54 |
| 7.00 |
| 6.15 |

|      |
|------|
| 6.46 |
| 6.69 |
| 6.31 |
| 5.75 |
| 6.92 |
| 7.00 |
| 6.85 |
| 4.62 |
| 6.23 |
| 6.62 |
| 7.00 |
| 7.00 |
| 7.00 |
| 6.69 |
| 6.85 |
| 6.91 |
| 7.00 |
| 6.75 |
| 7.00 |
| 7.00 |
| 7.00 |
| 6.92 |
| 6.00 |
| 6.85 |
| 7.00 |
| 7.00 |
| 6.62 |
| 7.00 |
| 6.92 |
| 7.00 |
| 6.38 |
| 6.62 |
| 6.69 |
| 7.00 |
| 6.69 |
| 6.85 |
| 6.38 |
| 6.46 |
| 7.00 |
| 6.85 |
| 6.69 |
| 7.00 |
| 7.00 |
| 6.83 |

|      |
|------|
| 6.62 |
| 7.00 |
| 1.00 |
| 7.00 |
| 6.69 |
| 7.00 |
| 6.62 |
| 6.38 |
